# Supplementary material
Source: Springer Nature journal article supplement (https://www.springermedizin.de/resource/supplementary/12888_2010_726_MOESM1_ESM.pdf/9478316)

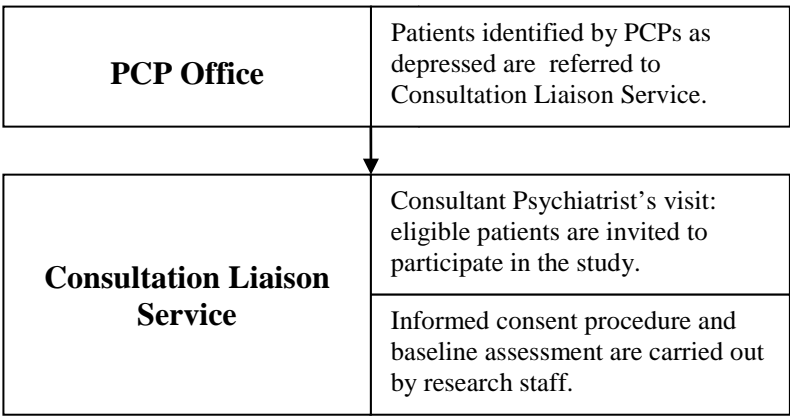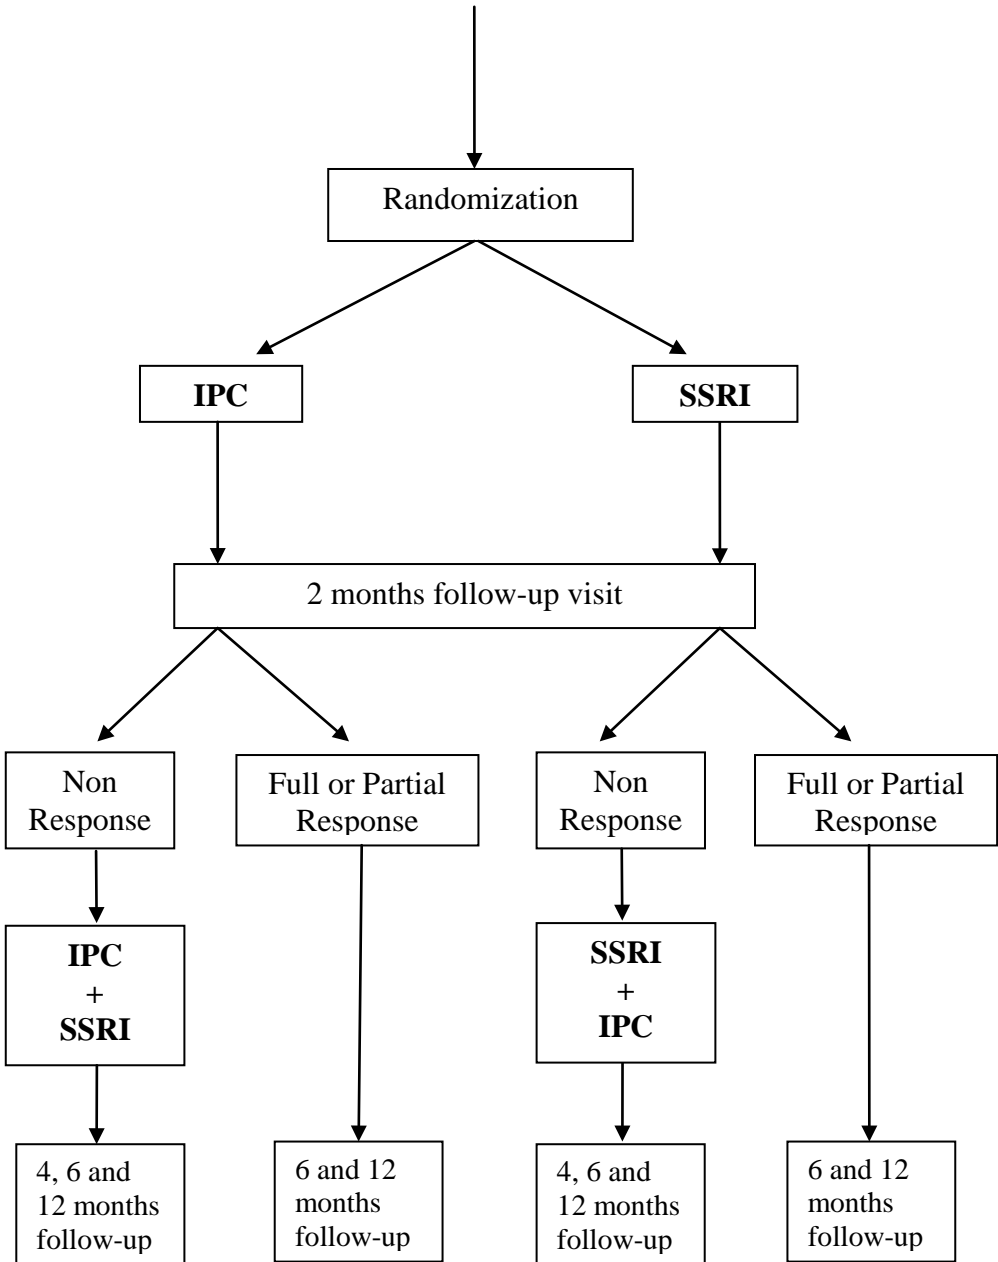

Supplement: MOESM1 [file 9478316]
